# Supplementary material
Source: PubMed Central journal article supplement (PMC6448764)
Supplement: NIHMS79916-supplement-Online_supplement.pdf [file NIHMS79916-supplement-Online_supplement.pdf]

**Synergistic activation of pro-inflammatory type-2 CD8<sup>+</sup> T lymphocytes by lipid mediators in severe eosinophilic asthma**

B Hilvering, TSC Hinks, L Stöger, E Marchi, M Salimi, R Shrimanker, W Liu, W Chen, J Luo, S Go, T Powell, J Cane, S Thulborn, A Kurioka, T Leng, J Matthews, C Connolly, C Borg, M Bafadhel, CB Willberg, A Ramasamy, R Djukanović, G Ogg, ID Pavord, P Klenerman and L Xue

**Supplementary Information**

**SUPPLEMENTARY TABLES**

Supplementary Table 1. Frequencies of Tc2 cells in both Oxford and Southampton cohorts

| Tc2 frequency<br>(mean ± SD) |                               | Control<br>(n=16) | Asthma                 |                            | p-value*<br>< |
|------------------------------|-------------------------------|-------------------|------------------------|----------------------------|---------------|
|                              |                               |                   | Eosinophilic<br>(n=26) | Non-eosinophilic<br>(n=14) |               |
| <b>Blood</b>                 | % in CD8 <sup>+</sup> T cells | 1.32 ± 0.79       | 6.24 ± 5.18            | 2.93 ± 2.46                | 0.05          |
|                              | % in leukocytes               | 0.084 ± 0.04      | 0.309 ± 0.26           | 0.096 ± 0.10               | 0.0003        |
|                              | x10 <sup>6</sup> /L in blood  | 4.87 ± 2.29       | 17.87 ± 14.2           | 6.81 ± 6.57                | 0.0003        |
|                              |                               | <b>(n=17)</b>     | <b>(n=8)</b>           | <b>(n=24)</b>              |               |
| <b>BB</b>                    | % in CD8 <sup>+</sup> T cells | 0.2 ± 0.63        | 2.05 ± 1.44            | 0.1 ± 0.56                 | 0.005         |
| <b>BAL</b>                   | % in CD8 <sup>+</sup> T cells | 0.2 ± 0.71        | 1.5 ± 1.40             | 0.2 ± 0.52                 | 0.005         |

\* p-values were obtained from analysis with one-way ANOVA followed by the Tukey's test.

Supplementary Table 2. List of cytokine, chemokine, their receptor and CD molecule genes regulated by PGD<sub>2</sub>, LTE<sub>4</sub> or their combination in Tc2 cells detected by microarray\*

| Up-regulation  |                  |                  |                                     | Down-regulation |                  |                  |                                     |
|----------------|------------------|------------------|-------------------------------------|-----------------|------------------|------------------|-------------------------------------|
| Gene           | Sample treatment |                  |                                     | Gene            | Sample treatment |                  |                                     |
|                | PGD <sub>2</sub> | LTE <sub>4</sub> | PGD <sub>2</sub> + LTE <sub>4</sub> |                 | PGD <sub>2</sub> | LTE <sub>4</sub> | PGD <sub>2</sub> + LTE <sub>4</sub> |
| <i>IL3</i>     | +                | +                | +++**                               | <i>BMP8B</i>    | -                | -                | -                                   |
| <i>IL5</i>     | +                | +                | ++                                  | <i>CYFIP2</i>   | -                | -                | -                                   |
| <i>IL8</i>     | +                | +                | +++                                 | <i>FLT3LG</i>   | -                | -                | -                                   |
| <i>IL10</i>    | +                | +                | +                                   | <i>GDF11</i>    | -                | -                | -                                   |
| <i>IL13</i>    | +                |                  | ++                                  | <i>LASS1</i>    | -                | -                | -                                   |
| <i>IL16</i>    | +                | +                | +                                   | <i>TNFSF13</i>  | -                | -                | -                                   |
| <i>IL21</i>    |                  |                  | +                                   | <i>TSLP</i>     | -                | -                | -                                   |
| <i>IL22</i>    |                  |                  | ++                                  | <i>CCL2</i>     | -                | -                | -                                   |
| <i>IL24</i>    | +                | +                |                                     | <i>CCL21</i>    | -                | -                | -                                   |
| <i>IL25</i>    | +                | +                | +                                   | <i>IL3RA</i>    | -                | -                | -                                   |
| <i>IL26</i>    | +                | +                | +                                   | <i>IL6R</i>     | -                | -                | -                                   |
| <i>BMP1</i>    | +                |                  | +                                   | <i>IL7R</i>     | -                | -                | -                                   |
| <i>CSF2</i>    | +                | +                | ++                                  | <i>IL11RA</i>   | -                | -                | -                                   |
| <i>GDF11</i>   |                  | +                |                                     | <i>CCK1</i>     | -                | -                | -                                   |
| <i>TNF</i>     | +                | +                | ++                                  | <i>CNTFR</i>    | -                | -                | -                                   |
| <i>TNFSF8</i>  | +                | +                | +                                   | <i>LEPR</i>     | -                | -                | -                                   |
| <i>TNFSF11</i> | +                | +                | +                                   | <i>CMKLR1</i>   | -                | -                | -                                   |
| <i>TNFSF13</i> |                  | +                |                                     | <i>CD2</i>      | -                | -                | -                                   |
| <i>TNFSF14</i> | +                | +                | +                                   | <i>CD14</i>     | -                | -                | -                                   |
| <i>LASS1</i>   |                  |                  | +                                   | <i>CD40</i>     | -                | -                | -                                   |
| <i>LIF</i>     | +                | +                | +                                   | <i>CD46</i>     | -                | -                | -                                   |
| <i>LTA</i>     | +                | +                | +                                   | <i>CD58</i>     | -                | -                | -                                   |
| <i>NAMPT</i>   | +                |                  | +                                   | <i>CD99</i>     | -                | -                | -                                   |
| <i>XCL1</i>    | +                | +                | ++                                  | <i>CD79A</i>    | -                | -                | -                                   |
| <i>FASLG</i>   | +                | +                | ++                                  | <i>CD79B</i>    | -                | -                | -                                   |
| <i>CCL2</i>    | +                |                  | +                                   | <i>CD99L2</i>   | -                | -                | -                                   |
| <i>CCL3</i>    |                  |                  | +                                   | <i>CD300LG</i>  | -                | -                | -                                   |
| <i>CCL4</i>    |                  |                  | +                                   | <i>GPR44</i>    | -                | -                | -                                   |
| <i>CCL7</i>    |                  | +                |                                     |                 |                  |                  |                                     |
| <i>CCL21</i>   | +                | +                |                                     |                 |                  |                  |                                     |
| <i>CCL22</i>   | +                | +                | +                                   |                 |                  |                  |                                     |
| <i>CCL25</i>   | +                |                  | +                                   |                 |                  |                  |                                     |
| <i>CD2BP2</i>  | +                | +                | +                                   |                 |                  |                  |                                     |
| <i>CMTM4</i>   | +                |                  | +                                   |                 |                  |                  |                                     |
| <i>PF4V1</i>   | +                |                  | +                                   |                 |                  |                  |                                     |
| <i>PPBP</i>    | +                | +                | +                                   |                 |                  |                  |                                     |
| <i>IL1RL1</i>  |                  |                  | +                                   |                 |                  |                  |                                     |
| <i>IL2RB</i>   | +                | +                | +                                   |                 |                  |                  |                                     |
| <i>IL2RG</i>   | +                | +                | +                                   |                 |                  |                  |                                     |
| <i>IL3RA</i>   |                  | +                | +                                   |                 |                  |                  |                                     |
| <i>IL6R</i>    |                  | +                |                                     |                 |                  |                  |                                     |
| <i>IL11RA</i>  | +                | +                |                                     |                 |                  |                  |                                     |
| <i>CD1E</i>    |                  |                  | +                                   |                 |                  |                  |                                     |
| <i>CD7</i>     | +                | +                | +                                   |                 |                  |                  |                                     |
| <i>CD14</i>    |                  | +                |                                     |                 |                  |                  |                                     |
| <i>CD28</i>    | +                | +                | +                                   |                 |                  |                  |                                     |
| <i>CD40LG</i>  | +                | +                | +                                   |                 |                  |                  |                                     |
| <i>CD44</i>    | +                |                  | +                                   |                 |                  |                  |                                     |
| <i>CD46</i>    |                  | +                |                                     |                 |                  |                  |                                     |
| <i>CD53</i>    | +                |                  | +                                   |                 |                  |                  |                                     |
| <i>CD55</i>    | +                | +                | +                                   |                 |                  |                  |                                     |
| <i>CD58</i>    | +                |                  | +                                   |                 |                  |                  |                                     |
| <i>CD59</i>    | +                | +                | +                                   |                 |                  |                  |                                     |
| <i>CD69</i>    | +                | +                | +                                   |                 |                  |                  |                                     |
| <i>CD79A</i>   |                  | +                | +                                   |                 |                  |                  |                                     |
| <i>CD82</i>    | +                | +                | +                                   |                 |                  |                  |                                     |
| <i>CD99</i>    |                  | +                |                                     |                 |                  |                  |                                     |
| <i>CD99L2</i>  |                  | +                |                                     |                 |                  |                  |                                     |
| <i>CD109</i>   | +                | +                | +                                   |                 |                  |                  |                                     |
| <i>CD151</i>   | +                | +                | +                                   |                 |                  |                  |                                     |
| <i>CD164</i>   | +                | +                | +                                   |                 |                  |                  |                                     |
| <i>CD226</i>   | +                | +                | +                                   |                 |                  |                  |                                     |

\* The concentrations of PGD<sub>2</sub> and LTE<sub>4</sub> were 100 nM and 50 nM respectively.

\*\* ++ indicates fold change ≥3; +++ indicates fold change ≥6.

Supplementary Table 3. Antibodies used for flow cytometry and PrimeFlow RNA assays

| <b>Antigen</b>     | <b>Clone</b> | <b>Supplier</b>   | <b>Used for</b>           |
|--------------------|--------------|-------------------|---------------------------|
| CCR7               | 3D12         | eBioscience       | Flow cytometry            |
| CD3                | SK7          | BioLegend         | Flow cytometry            |
| CD3                | UCTH1        | eBioscience       | Flow cytometry, PrimeFlow |
| CD4                | L200         | BD Biosciences    | Flow cytometry            |
| CD4                | OKT4         | BioLegend         | Flow cytometry, PrimeFlow |
| CD8                | SK1          | BioLegend         | Flow cytometry, PrimeFlow |
| CD62L              | DREG-56      | eBioscience       | Flow cytometry            |
| CRTH2              | BM16         | Miltenyi Biotec   | Flow cytometry, PrimeFlow |
| CysLT <sub>1</sub> | polyclonal   | Novus Biologicals | Flow cytometry            |
| Granzyme A         | 356412       | R&D Systems       | Flow cytometry            |
| Granzyme B         | GB11         | BD Biosciences    | Flow cytometry            |
| Granzyme K         | 24C3         | Immunotools       | Flow cytometry            |
| IL-5               | JES1-39D10   | BioLegend         | Flow cytometry            |
| IL-13              | 85BRD        | eBioscience       | Flow cytometry            |
| IL-13              | 11711        | R&D Systems       | Flow cytometry            |
| perforin           | B-D48        | BioLegend         | Flow cytometry            |

Supplementary Table 4. Primers and probes used for q-PCR

| Gene   | Primer                                                         | Probe No. |
|--------|----------------------------------------------------------------|-----------|
| CSF1   | 5'-GCAAGAAGTCAACAACAGC-3'<br>5'-ATCAGGCTTGGTCACACAT-3'         | 19        |
| CSF2   | 5'-TCTCAGAAATGTTTGACCTCCA-3'<br>5'-GCCCTTGAGCTTGGTGAG-3'       | 1         |
| CYSLT1 | 5'-ACTCCAGTGCCAGAAAGAGG-3'<br>5'-GCGGAAGTCATCAATAGTGCA-3'      | 29        |
| CYSLT2 | 5'-CTAGAGTCCTGTGGGCTGAAA-3'<br>5'-GTAGGATCCAATGTGCTTTGC-3'     | 48        |
| DP1    | 5'-CCTGGAGGAGCTGGATCA-3'<br>5'-GCTCCATAGTAAGCGCGATAAA-3'       | 18        |
| GAPDH  | 5'-AGCCACATCGCTCAGACAC-3'<br>5'-GCCCAATACGACCAAATCC-3'         | 60        |
| GPR44  | 5'-CCTGTGCTCCCTCTGTGC-3'<br>5'-TCTGGAGACGGCTCATCTG-3'          | 43        |
| GPR99  | 5'-CAACCTGATTTTGAAGTCAACT<br>5'-GGATAATCGTGGTATAGCAAAGTG       | 16        |
| IL3    | 5'-TTGCCTTTGCTGGACTTCA-3'<br>5'-CTGTTGAATGCCTCCAGGTT-3'        | 60        |
| IL4    | 5'-CACCGAGTTGACCGTAACAG-3'<br>5'-GCCCTGCAGAAGGTTTCC-3'         | 16        |
| IL5    | 5'-GGTTTGTTCAGCCAAAGAT-3'<br>5'-TCTTGGCCCTCATTCTCACT-3'        | 25        |
| IL8    | 5'-AGACAGCAGAGCACACAAGC-3'<br>5'-ATGGTTCCTTCCGGTGGT-3'         | 72        |
| IL9    | 5'-CTTCCTCATCAACAAGATGCAG-3'<br>5'-AGAGACAAGTGGTCACATTAGCAC-3' | 59        |
| IL13   | 5'-AGCCCTCAGGGAGCTCAT-3'<br>5'-CTCCATACCATGCTGCCATT-3'         | 17        |
| IL21   | 5'-AGGAAACCACCTTCCACAAA-3'<br>5'-GAATCACATGAAGGGCATGTT-3'      | 7         |
| IL22   | 5'-CAACAGGCTAAGCACATGTCA-3'<br>5'-ACTGTGTCCTTCAGCTTTTGC-3'     | 6         |
| P2Y12  | 5'-TTTGCCTAACATGATTCTGACC-3'<br>5'-GGAAAGAGCATTTCCTCACATTCT-3' | 27        |
| TNF    | 5'-CAGCCTCTTCTCCTTCCTGAT-3'<br>5'-GCCAGAGGGCTGATTAGAGA-3'      | 29        |

SUPPLEMENTARY FIGURES

Supplementary Fig. 1

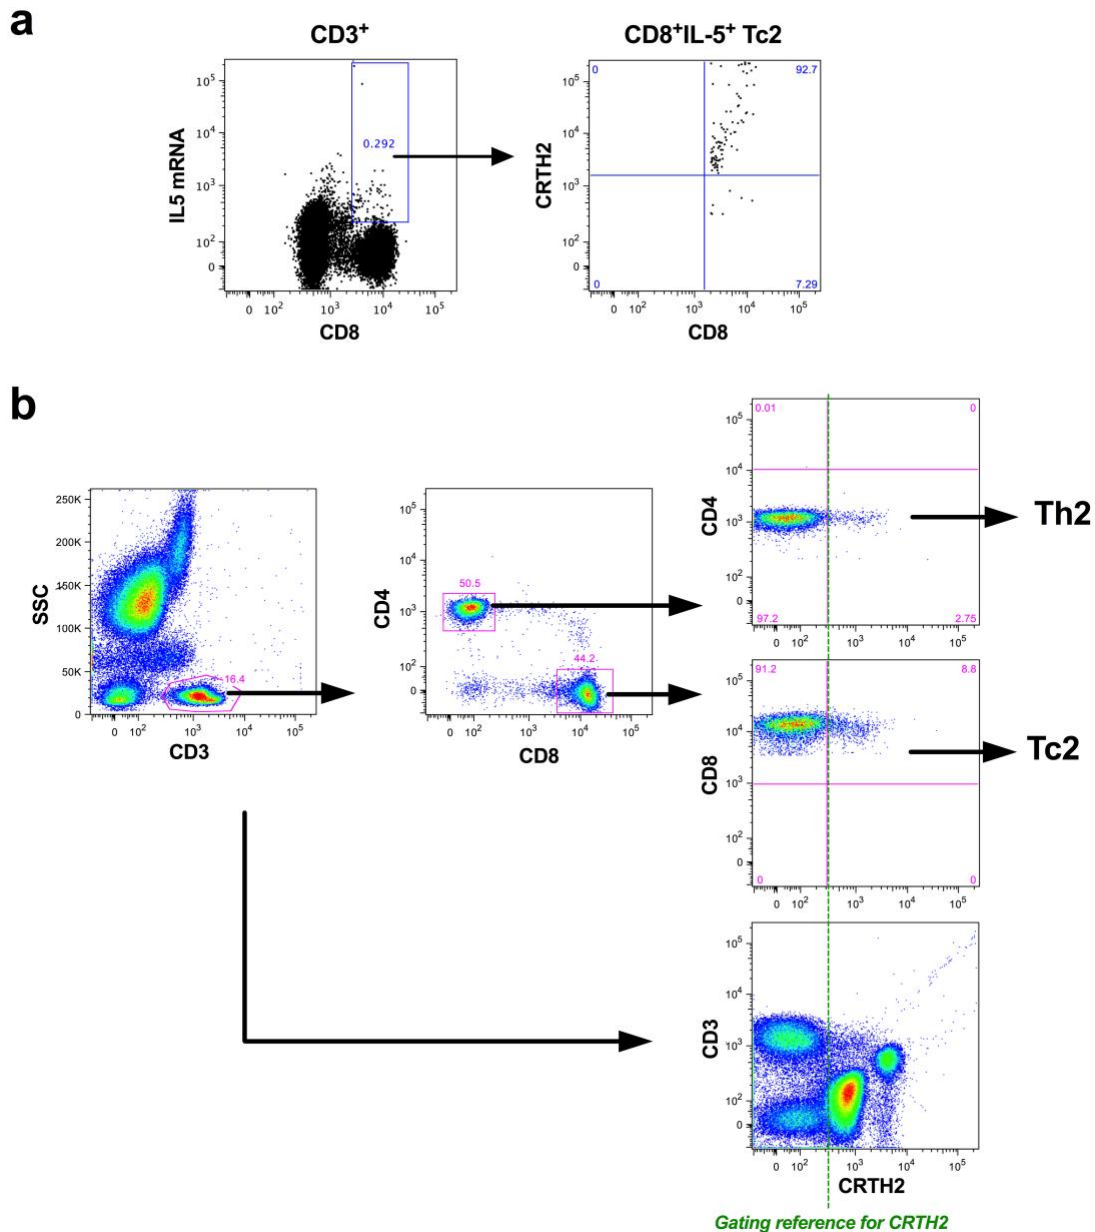

**Supplementary Fig. 1** Tc2 cells are CD3<sup>+</sup>CD8<sup>+</sup>CRTH2<sup>+</sup> T lymphocytes. **a** IL-5-producing CD3<sup>+</sup>CD8<sup>+</sup> Tc2 cells in human peripheral blood *ex-vivo* are CRTH2 positive detected with PrimeFlow RNA assay. **b** Gating strategies for Tc2 and Th2 cells in peripheral blood from the Oxford cohort. Fresh bloods were stained with a mixture of antibodies and analysed with flow cytometry. Tc2 cells were gated as CD3<sup>+</sup>CD4<sup>-</sup>CD8<sup>+</sup>CRTH2<sup>+</sup> cells and Th2 cells were gated as CD3<sup>+</sup>CD4<sup>+</sup>CD8<sup>-</sup>CRTH2<sup>+</sup> cells. CRTH2 negative cell groups were used as gating reference.

Supplementary Fig. 2

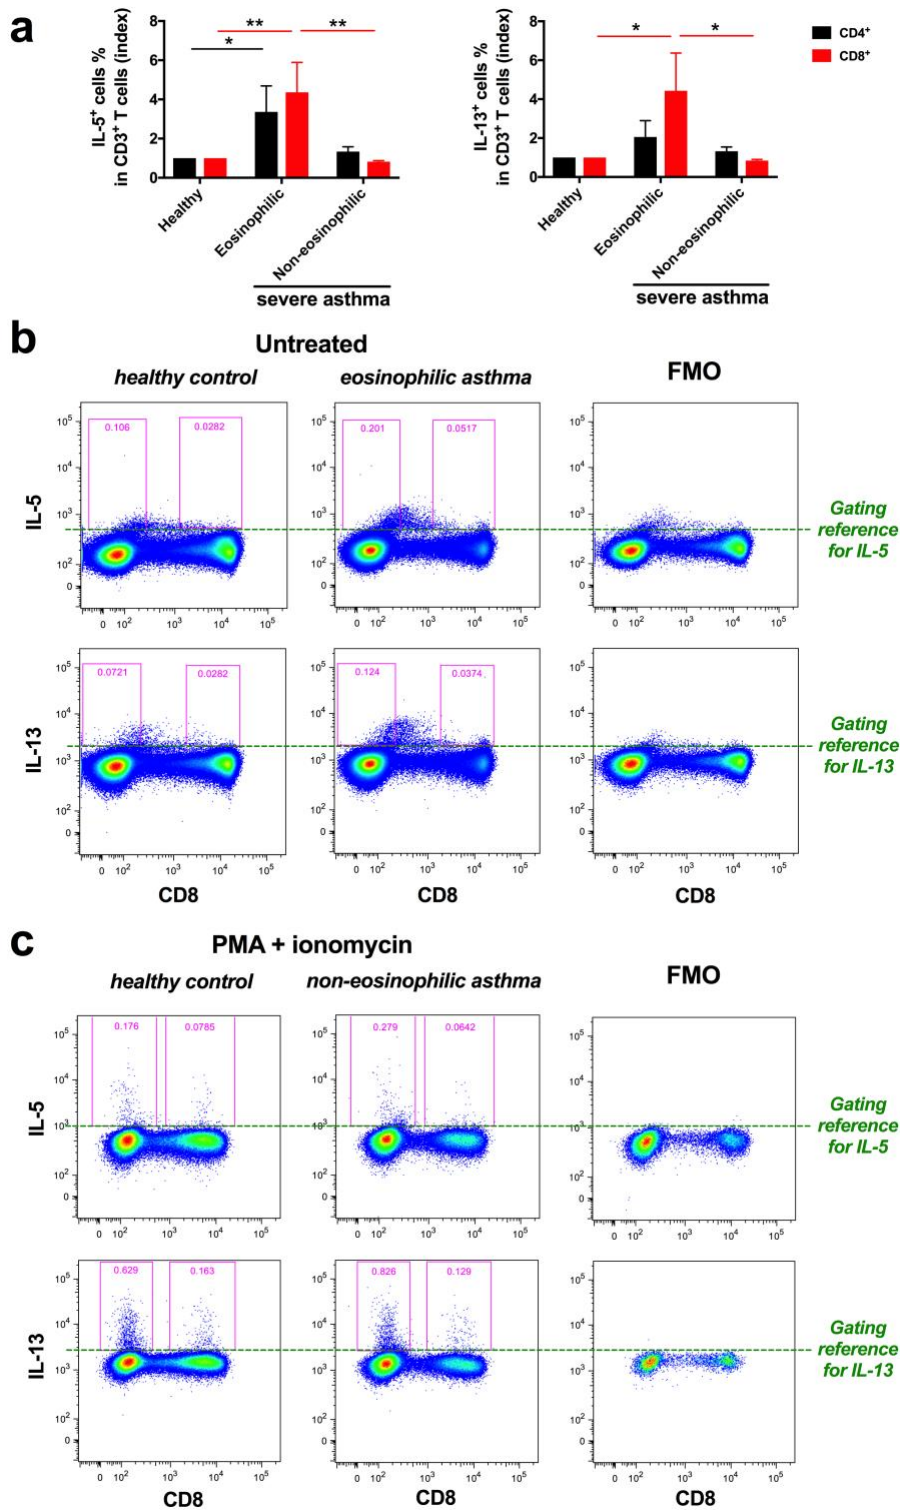

**Supplementary Fig. 2** Type-2 cytokine producing CD8<sup>+</sup> Tc2 cells are enriched in the blood from severe eosinophilic but not non-eosinophilic asthma. PBMCs isolated from fresh blood were treated with (a, c) or without (b) 25 ng/ml PMA and 1 μg/ml ionomycin for 6 h, and then

the frequencies of IL-5 or IL-13 secreting CD3<sup>+</sup>CD8<sup>-</sup> and CD3<sup>+</sup>CD8<sup>+</sup> T-cells were detected by flow cytometry with ICS. IL-5<sup>+</sup>CD8<sup>+</sup> or IL-13<sup>+</sup>CD8<sup>+</sup> T-cells were increased in the blood from patient with severe eosinophilic (**a**, **b**) but not non-eosinophilic (**c**) asthma. For comparison in **a**, the frequencies of IL-5/IL-13 secreting cells in healthy control samples were treated as 1. Fluorescence-minus-one (FMO) for IL-5 or IL-13 were used as gating reference. \**p* < 0.05, \*\**p* < 0.01; (n=5 for **a**; Data in **b** and **c** are representative of 5 or 3 independent experiments respectively).

### Supplementary Fig. 3

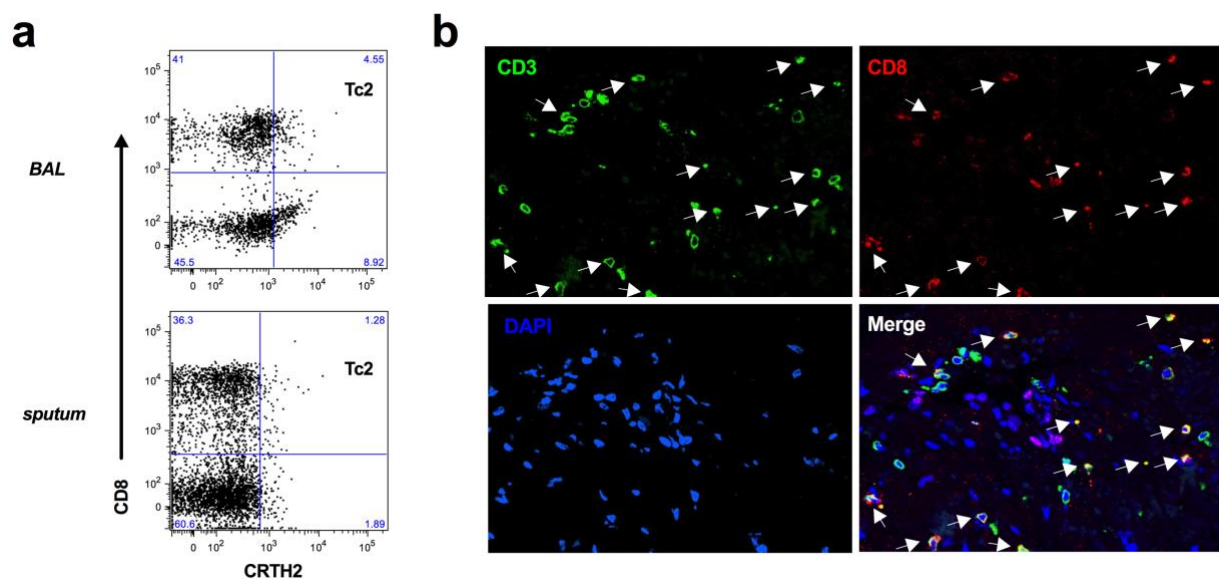

**Supplementary Fig. 3** Tc2 cells are detectable in lung in severe eosinophilic asthma. **a** CD3<sup>+</sup>CD8<sup>+</sup>CRTH2<sup>+</sup> Tc2 cells detected in BAL and sputum from severe asthma patients by flow cytometry. **b** CD3<sup>+</sup>CD8<sup>+</sup> T-cells (arrows) detected in BB by immunohistochemistry. Data in **a** and **b** are representative of >10 and 3 independent experiments respectively.

## Supplementary Fig. 4

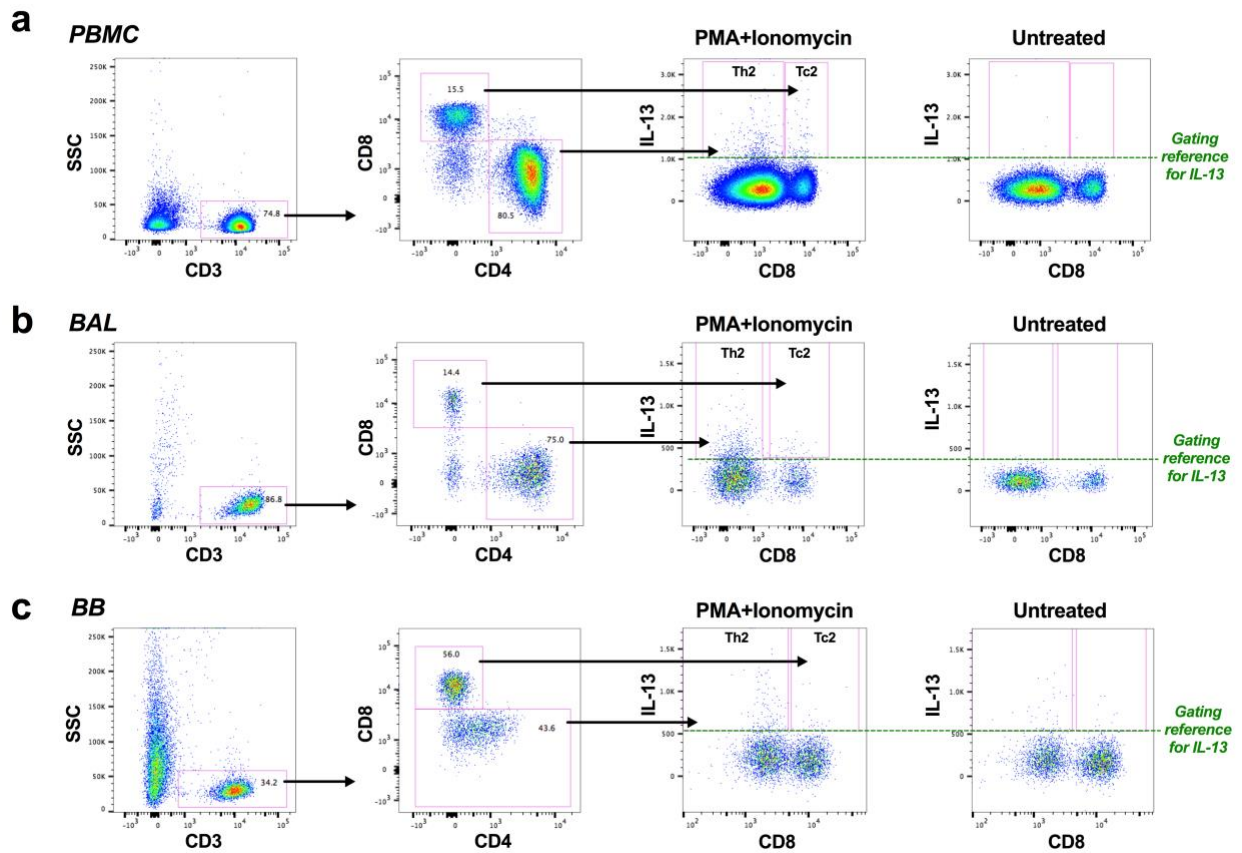

**Supplementary Fig. 4** Enumeration of type-2 cytokine producing CD8<sup>+</sup> Tc2 and CD4<sup>+</sup> Th2 cells in the blood and airways from Southampton cohort. **a, b, c** PBMCs isolated from fresh blood (**a**), bronchoalveolar lavage (BAL) cells (**b**) and endobronchial biopsies (BB) (**c**) were treated with 25 ng/ml PMA and 0.5  $\mu$ g/ml ionomycin for 5 h. Biopsies were then dispersed with collagenase I at 1 mg/ml for 1 hour, and frequencies of IL-13 secreting CD3<sup>+</sup>CD4<sup>+</sup> (PBMC and BAL) or CD3<sup>+</sup>8<sup>-</sup> (biopsies) (Th2) and CD3<sup>+</sup>CD8<sup>+</sup> (Tc2) T-cells were detected by flow cytometry with ICS. Untreated samples were used as control for gating reference.



Supplementary Fig. 5

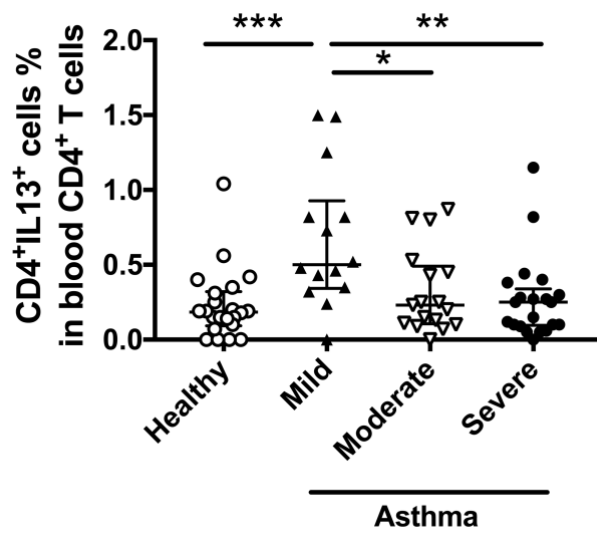

**Supplementary Fig. 5** Frequencies of IL-13 secreting CD3<sup>+</sup>CD4<sup>+</sup> T cells in blood were increased in patients with mild asthma but not in moderate or severe asthma from the Southampton cohort. The frequencies of IL-13 secreting cells determined with ICS were compared based on asthma severity according to global physician assessment. \* $p < 0.05$ , \*\* $p < 0.01$ , \*\*\* $p < 0.001$ .

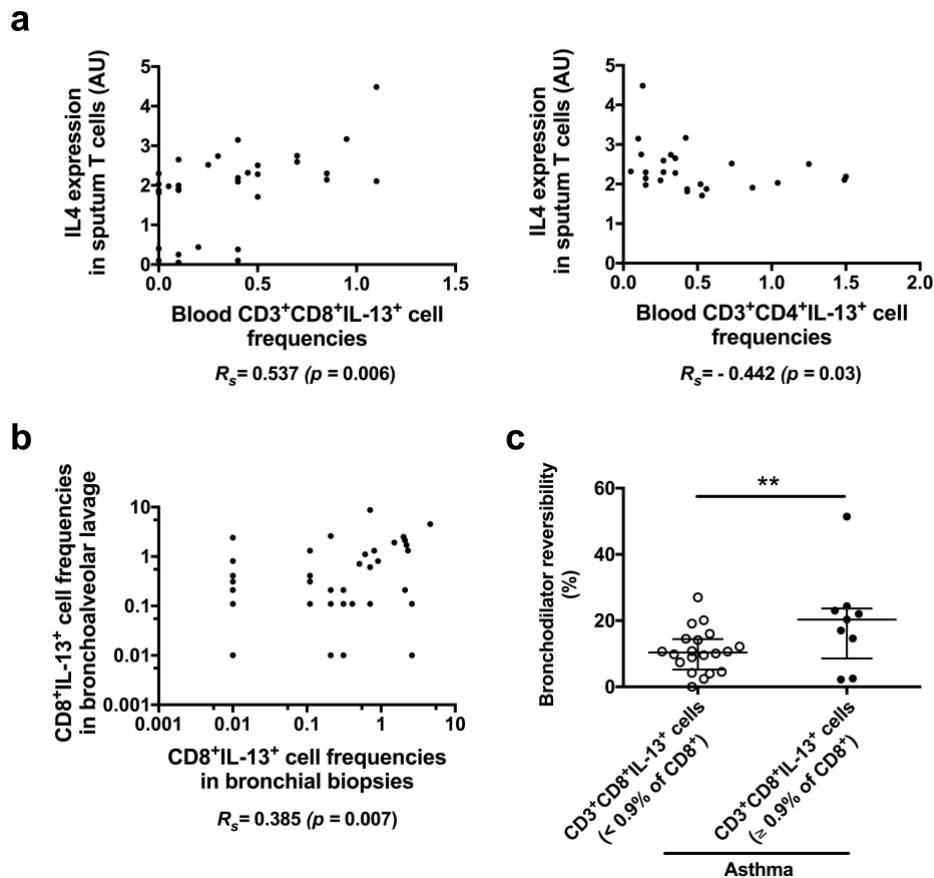

**Supplementary Fig. 6** Frequencies of Tc2 but not Th2 are correlated with lung inflammation in the Southampton cohort. **a** Relative expression of *IL4* in T-cells measured by microarray in FACS sorted CD3<sup>+</sup> cells from induced sputum from the Southampton cohort, is correlated positively with peripheral blood CD3<sup>+</sup>CD8<sup>+</sup>IL-13<sup>+</sup> (Tc2) frequencies (% in CD8<sup>+</sup> T-cells), but negatively with peripheral blood CD3<sup>+</sup>CD4<sup>+</sup>IL-13<sup>+</sup> (Th2) frequencies (% in CD4<sup>+</sup> T-cells). Significant correlations were not observed with sputum IL-5 or IL-13 (not shown). **b** Tc2 frequencies in BB is correlated with that in BAL. **c** High CD3<sup>+</sup>CD8<sup>+</sup>IL-13<sup>+</sup> (Tc2) frequencies were arbitrarily defined as  $\geq 0.9\%$  in BB and/or  $\geq 0.7\%$  in blood, being equivalent to, or above, the top decile of Tc2 frequencies observed in healthy controls. High Tc2 frequencies are associated with high salbutamol bronchodilator reversibility in asthmatic subjects.  $R_s$  = Spearman's correlation coefficient. \*\*  $p < 0.007$ .

Supplementary Fig. 7

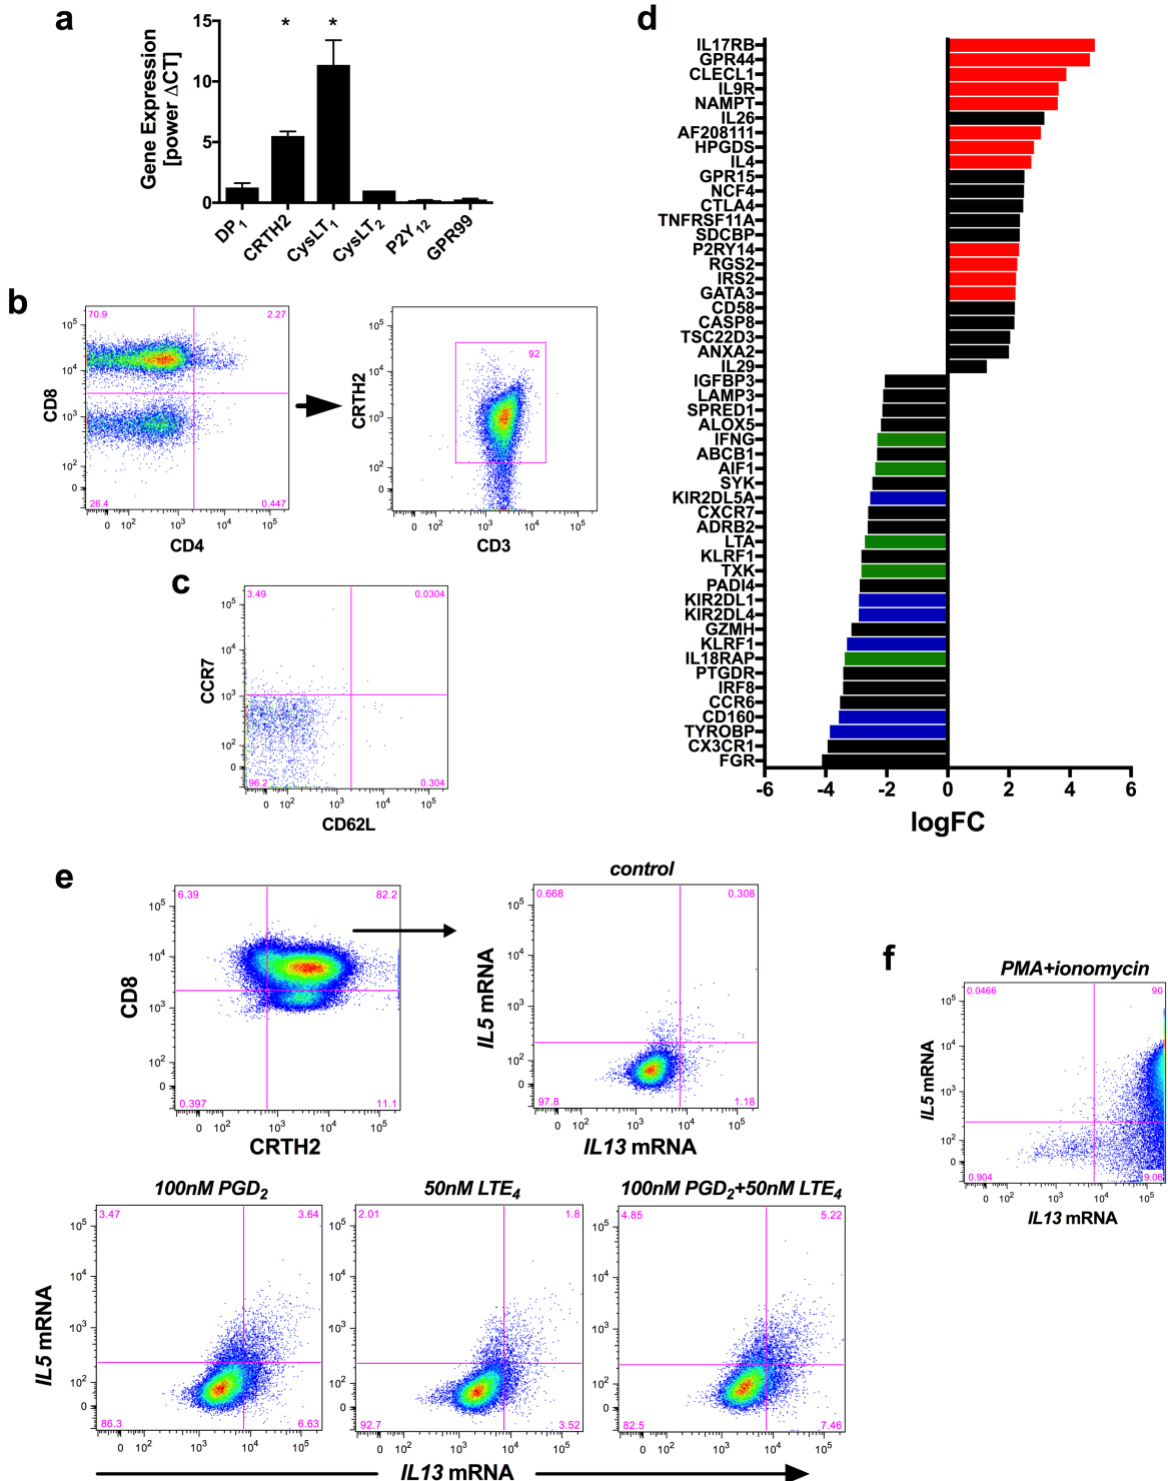

**Supplementary Fig. 7** Tc2 cells highly express CRTH2 and CysLT<sub>1</sub>, show high type-2 immunity related gene signature, and are capable of producing type-2 cytokines. **a** The levels

of mRNA for the receptors for PGD<sub>2</sub> (DP<sub>1</sub> and CRTH2) and for cysteinyl leukotrienes (CysLT<sub>1</sub>, CysLT<sub>2</sub>, P2Y<sub>12</sub> and GPR99) in Tc2 cells were compared by using qPCR. All the genes were normalized with GAPDH, and CysLT<sub>2</sub> was treated as 1. The levels of CRTH2 and CysLT<sub>1</sub> are significantly higher than other receptors. **b, c** Cultured Tc2 cells were (**b**) >70% CD8 positive and >90% CRTH2 positive, and (**c**) ~100% CCR7 and CD62L double negative. **d** Significant ( $p < 0.05$ ) differences in gene transcriptions between Tc2 cells (CD8<sup>+</sup>CRTH2<sup>+</sup>) and other CD8<sup>+</sup> cells (CD8<sup>+</sup>CRTH2<sup>-</sup>) was detected by using microarray. CD8<sup>+</sup>CRTH2<sup>+</sup> Tc2 cells express higher type-2 immunity related genes (red) but lower type-1 (green) and killer cell related genes (blue) than other CD8<sup>+</sup> cells. **e, f** Cultured Tc2 cells are capable to produce type-2 cytokines. *IL5*- and *IL13*-mRNA positive Tc2 cells were increased after treatment with PGD<sub>2</sub> and LTE<sub>4</sub> alone or their combination detected by using PrimeFlow RNA assay (**e**), and more than 90% of cells showed *IL5* and *IL13* double positive after stimulation with 25 ng/ml PMA and 750 ng/ml ionomycin (**f**). \* $p < 0.05$ ; data in **c, e** and **f** are representative of 3 independent experiments; (n=8 for **a**; n=3 for **d**).

Supplementary Fig. 8

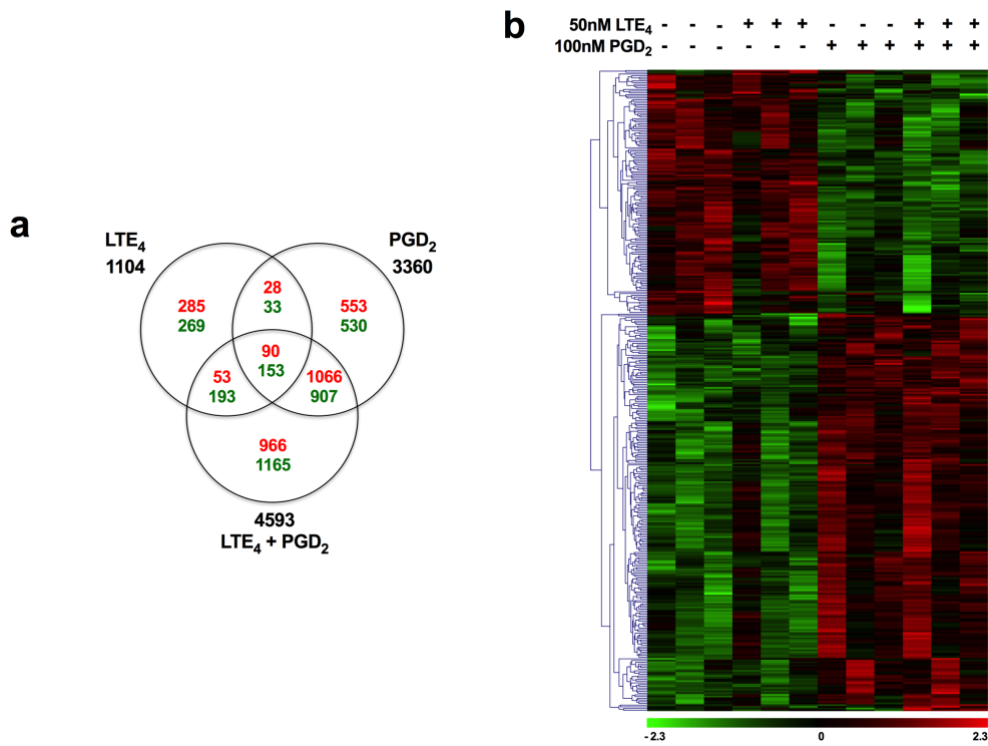

**Supplementary Fig. 8** Large numbers of gene transcripts in Tc2 cells are modulated by PGD<sub>2</sub> and LTE<sub>4</sub>. **a** Venn diagram and **b** heat map representing total numbers of genes significantly regulated ( $p < 0.05$ ), including up-regulations (red) and down-regulations (green), by 50 nM LTE<sub>4</sub>, 100 nM PGD<sub>2</sub> or their combination for 4 h in Tc2 cells detected with microarray. (n=3).

Supplementary Fig. 9

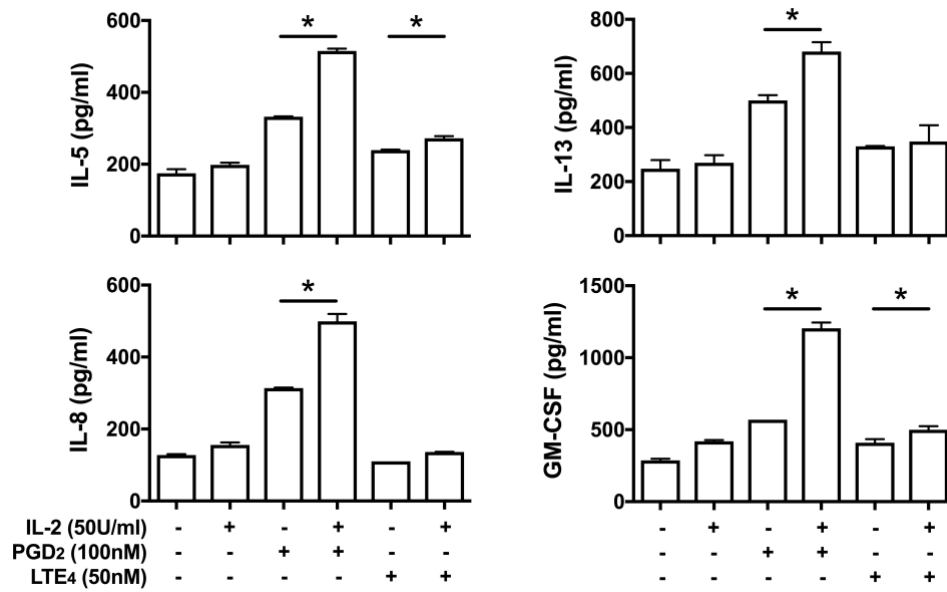

**Supplementary Fig. 9** IL-2 enhances cytokine production in Tc2 cells in response PGD<sub>2</sub> and LTE<sub>4</sub>. Release of IL-5, IL-8, IL-13 and GM-CSF by Tc2 cells in response to 100 nM PGD<sub>2</sub> or 50 nM LTE<sub>4</sub> detected with Luminex, particularly to PGD<sub>2</sub>, were increased in the presence of 50 U/ml IL-2. \*  $p < 0.05$ , (n=3).

**Supplementary Fig. 10**

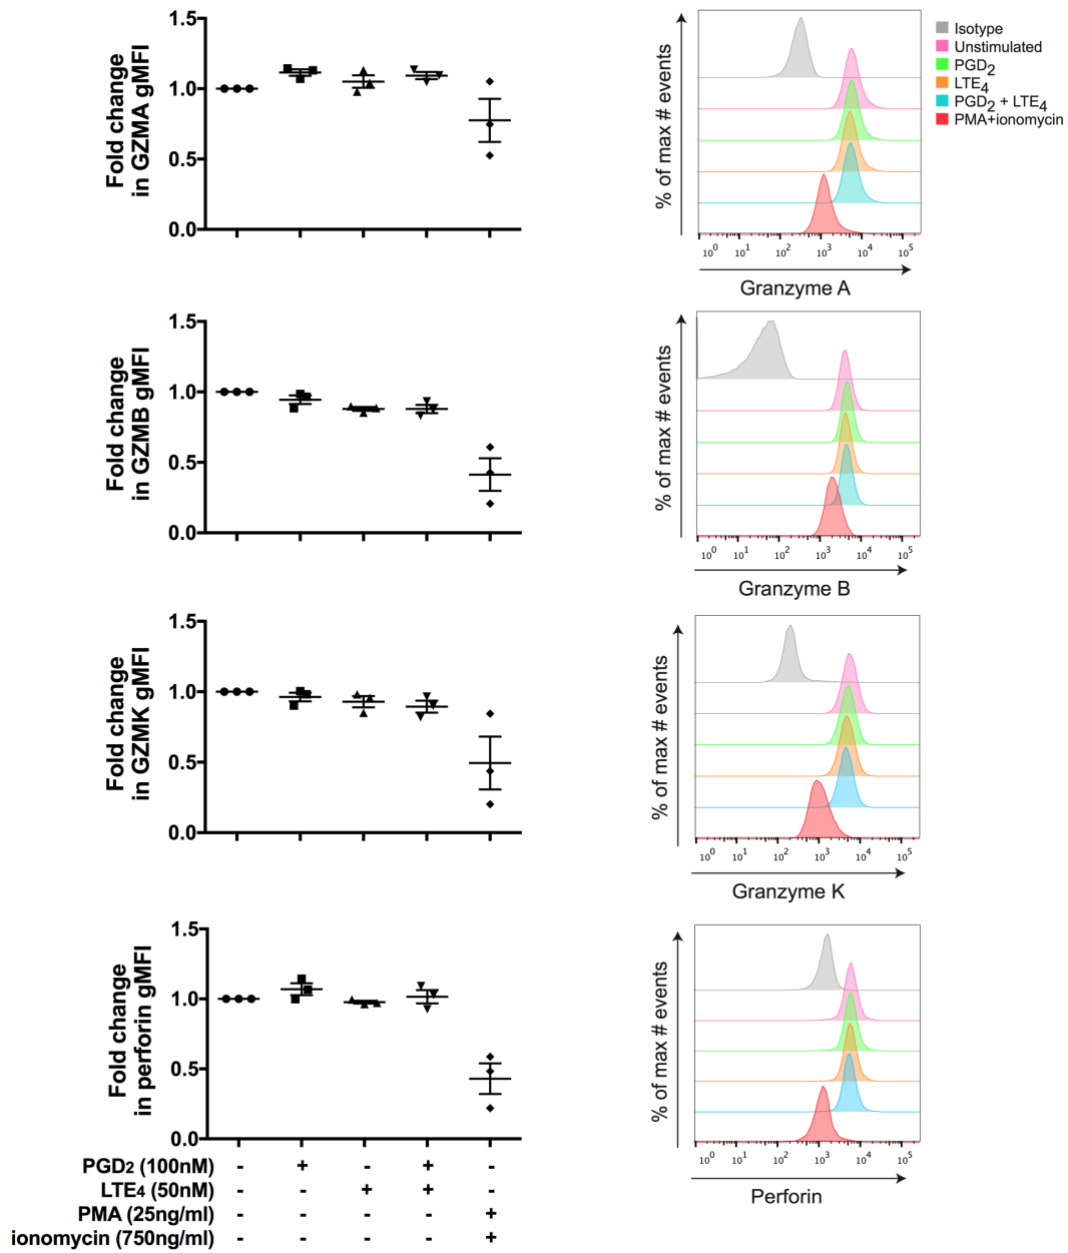

**Supplementary Fig. 10** Production of cytotoxins in Tc2 cells are not affected by PGD<sub>2</sub> and LTE<sub>4</sub>. The expression levels of GZMA, GZMB, GZMK and perforin in Tc2 cells determined with flow cytometry were not changed by treatment with 100 nM PGD<sub>2</sub>, 50 nM LTE<sub>4</sub> or their combination for 8 h. The reduction of the cytotoxin levels in Tc2 cells by 25 ng/ml PMA/750 ng/ml ionomycin was used as positive controls. Histogram shows a representative experiment for these assays (n=3).

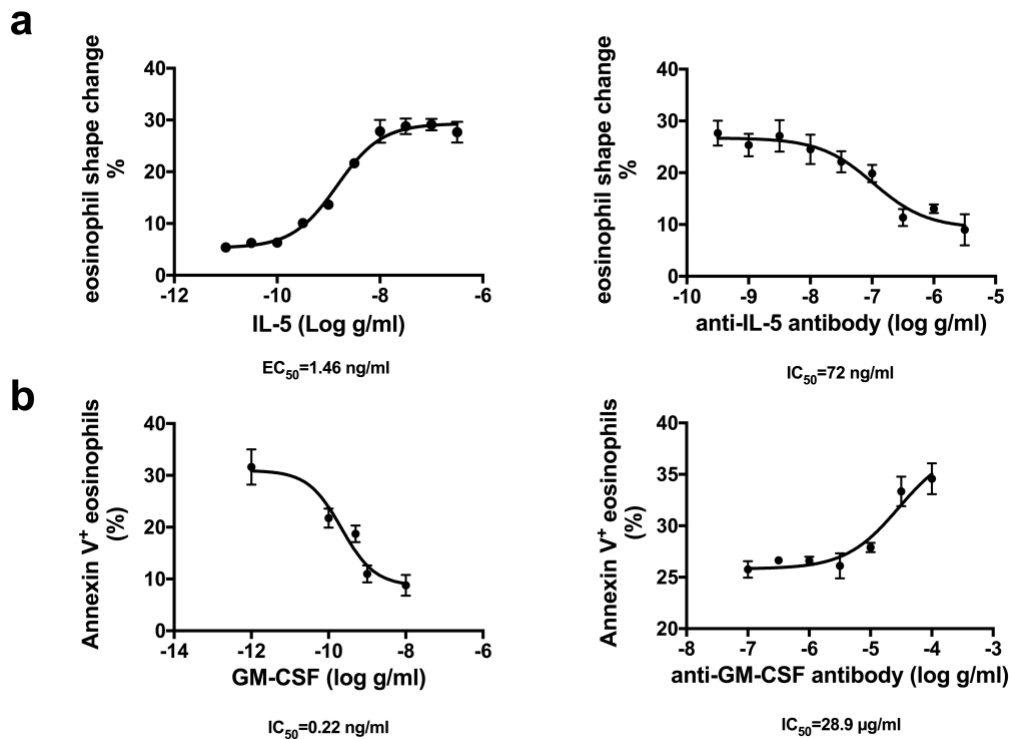

**Supplementary Fig. 11** Effects of IL-5 and GM-CSF on eosinophil shape-change and apoptosis are inhibited by the neutralizing antibodies against these cytokines. **a** Fresh blood was incubated with various concentrations of rhIL-5 (left panel) or with 10 ng/ml rhIL-5 in the presence of various concentrations of anti-IL-5 neutralizing antibody (right panel) for 1 h, and then the shape change of eosinophils in the blood was measured using flow cytometry. The percentage shape change was increased with the concentration of IL-5, which was reversed by anti-IL-5 antibody in a dose-dependent manner. **b** Eosinophil apoptosis was induced by serum deprivation in the presence of various concentrations of rhGM-CSF (left panel) or 1 ng/ml GM-CSF and various concentrations of anti-GM-CSF neutralizing antibody (right panel), and then cell apoptosis was determined with Annexin V staining by flow cytometry. Annexin V<sup>+</sup> eosinophils were reduced with increasing concentrations of GM-CSF, which was inhibited by anti-GM-CSF antibody in a dose-dependent manner. (n=10 for **a** left panel; n=3 for **a** right panel and **b**).



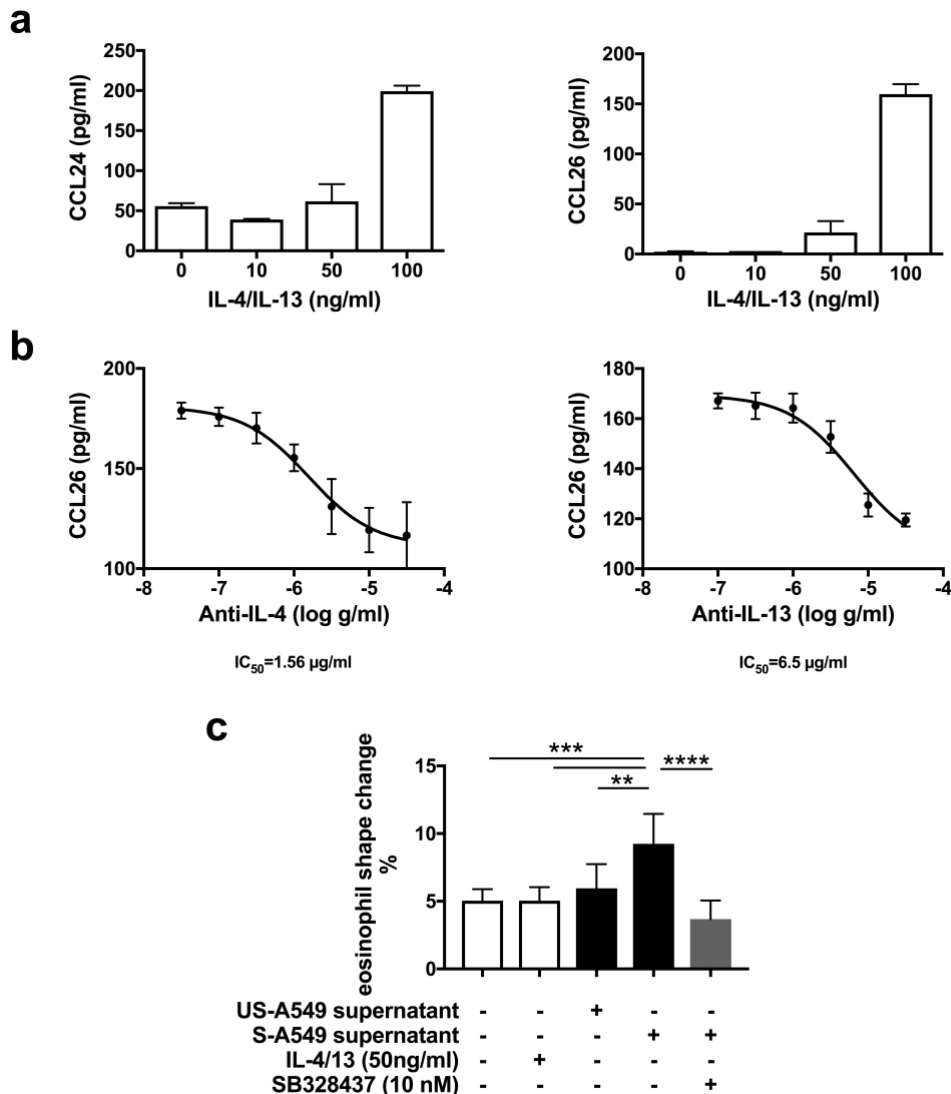

**Supplementary Fig. 12** Eotaxins induced by IL-4 and IL-13 in A549 cells were able to activate eosinophils. **a** A549 cells were incubated with or without increased concentrations of rhIL-4 and rhIL-13 overnight. Concentrations of CCL24 and CCL26 in cell culture supernatants of the cell culture were measured by Luminex assay. CCL24 and CCL26 were increased with increasing concentrations of IL-4 and IL-13. **b** A549 cells were treated with 100 ng/ml rhIL-4 and 100 ng/ml rhIL-13 in the presence of various concentrations of anti-IL-4 or anti-IL-13 neutralizing antibodies. The production of CCL26 induced by the cytokines was partially inhibited by the antibodies in a dose-dependent manner. **c** Fresh blood was incubated with

supernatants from A549 cells treated without (US-A549) or with 100 ng/ml rhIL-4 and 100 ng/ml rhIL-13 (S-A549) in the presence or absence of CCR3 antagonist SB328437 (10 nM). Activation of eosinophils in the blood was measured with eosinophil shape change assay. Normal medium and IL-4/13 were used as control. The supernatant from IL-4/13-activated A549 cells increased eosinophil shape change that was inhibited by SB328437.  $**p < 0.01$ ,  $***p < 0.001$ ,  $****p < 0.0001$ , (n=3).
